# Supplementary material
Source: Springer Nature journal article supplement (http://link.springer.com/content/esm/art:10.1186/1475-2875-13-242/file/MediaObjects/12936_2014_3272_MOESM1_ESM.pdf)
Supplement: MOESM1 [file 12936_2014_3272_MOESM1_ESM.pdf]

## **Additional File 1: Household variables used for construction of wealth index**

1. Main material of the floor
  - Earth/sand
  - Palm/bamboo/grass
  - Wood
  - Polished wood
  - Cement/tiles
2. Main material of the exterior walls
  - Bamboo / pitpit
  - Sago
  - Wood
  - Plywood
  - Masonite/Fibro
  - Cement or bricks
  - Iron sheets
3. Main material of the roof
  - Thatched grass
  - Sago palm leaves
  - Corrugated iron
  - Wood planks
  - Cement
4. Windows in main house
  - No windows
  - Windows, not screened
  - Windows, partly screened
  - Windows, all screened
5. Main source of drinking water
  - Surface water (river, pond, irrigation channel, etc.)
  - Open well (public/private)
  - Protected well (public/private)
  - Water tank
  - Piped into neighbourhood / public tap
  - Piped into dwelling
6. Main energy source for cooking
  - Firewood
  - Small twigs/tree branches/coconut shell
  - Kerosene
  - Gas
  - Electricity
7. Main source of lighting
  - None
  - Candle
  - Lantern
  - Pressure lamp/Coleman
  - Battery lantern
  - Solar power
  - Electricity

8. Ownership of household assets
  - Bed
  - Mattress
  - Table
  - Chair
  - Umbrella
  - Clothing cupboard
  - Coleman pressure lamp
  - Electric (battery) torch
  - Radio
  - Television
  - Mobile phone
  - Landline phone or wireless handset
  - Canoe, dugout (without motor)
  - Banana boat, ship (with motor)
  - Refrigerator
  - Bicycle / tricycle
  - Motorbike
  - Car or truck
9. Household ownership of livestock/animals (number of)
  - Chicken
  - Cassowaries
  - Goats and sheep
  - Pigs
  - Cows
  - Dogs
10. High quality house (see below)

**Variables used for construction of “high quality house” indicator**

1. Main source of drinking water
    - Piped into dwelling
- AND
2. Type of toilet facility is available to the household
    - Own flushing toilet
- AND
3. Main energy source for cooking
    - Gas or electricity
